# Supplementary material for: NMR-Based Metabolomics to Analyze the Effects of a Series of Monoamine Oxidases-B Inhibitors on U251 Cells
Source: MDPI journal article supplement (doi:10.3390/biom13040600), 2023-03-27
Supplement: s1 [file s1]

---

*Supplemental Materials*

**NMR-Based Metabolomics to Analyze the Effects of a Series of  
Monoamine Oxidases-B Inhibitors on U251 Cells**

Zili Guo, Jinping Gu, Miao Zhang, Feng Su, Weike Su, Yuanyuan Xie

**7 Supplementary Figures**

**5 Supplementary Tables**

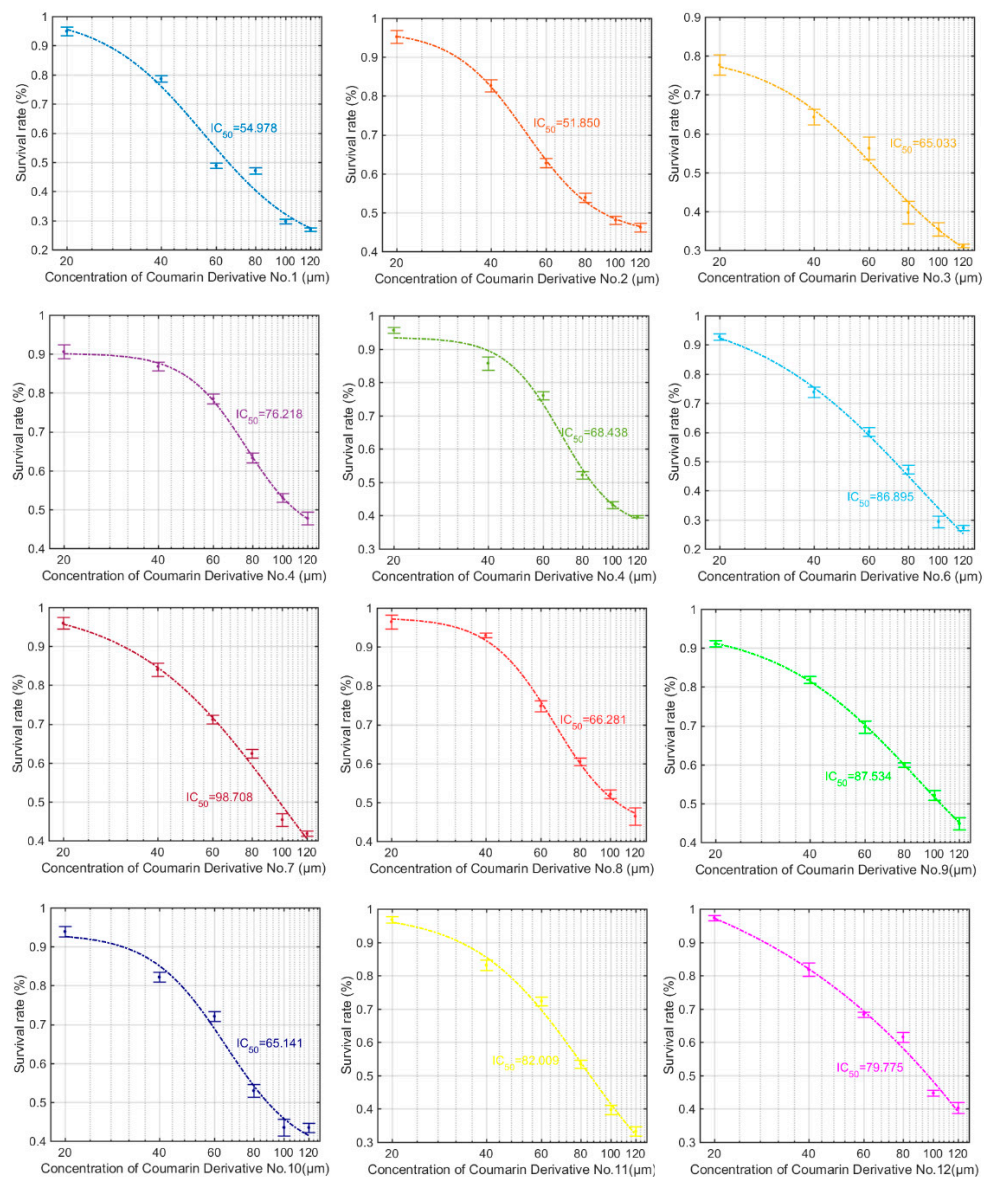

**Figure S1.** The  $IC_{50}$  value of coumarin derivatives in the U251 cells.

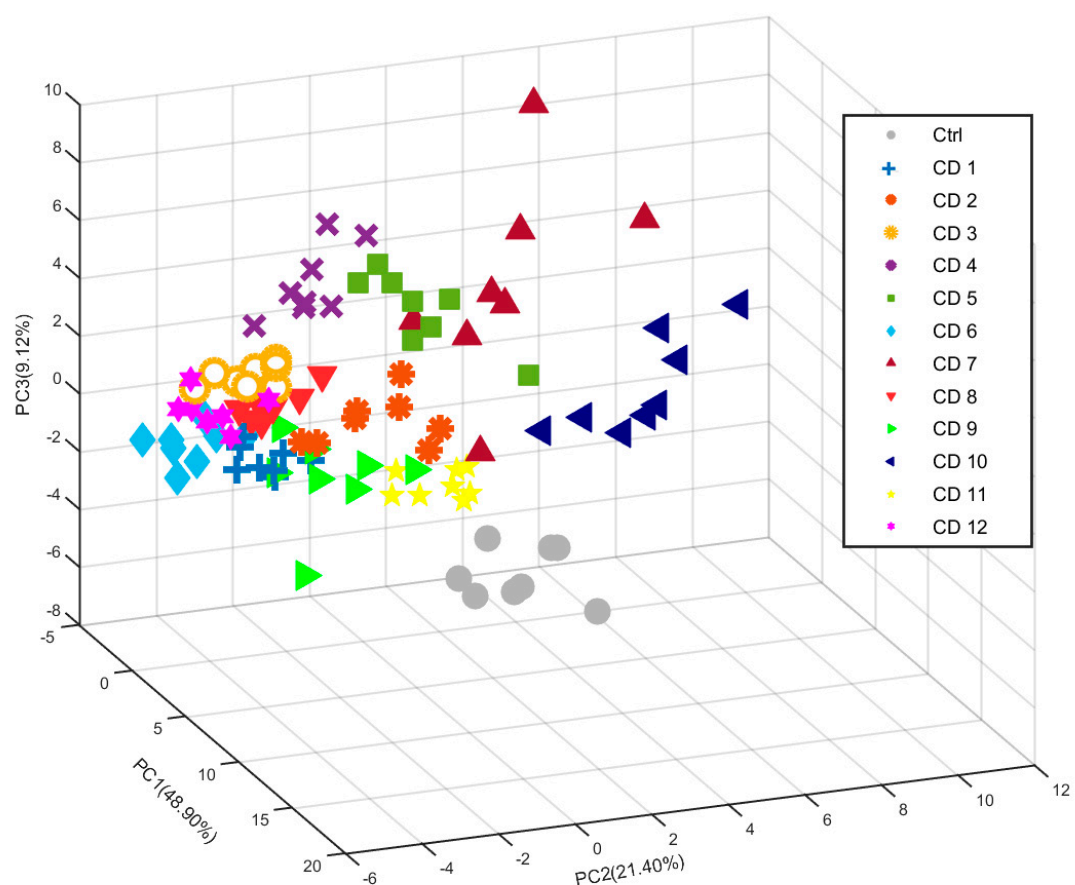

**Figure S2.** PCA scores plots of relative concentration of metabolites data from twelve coumarin derivatives and control group.

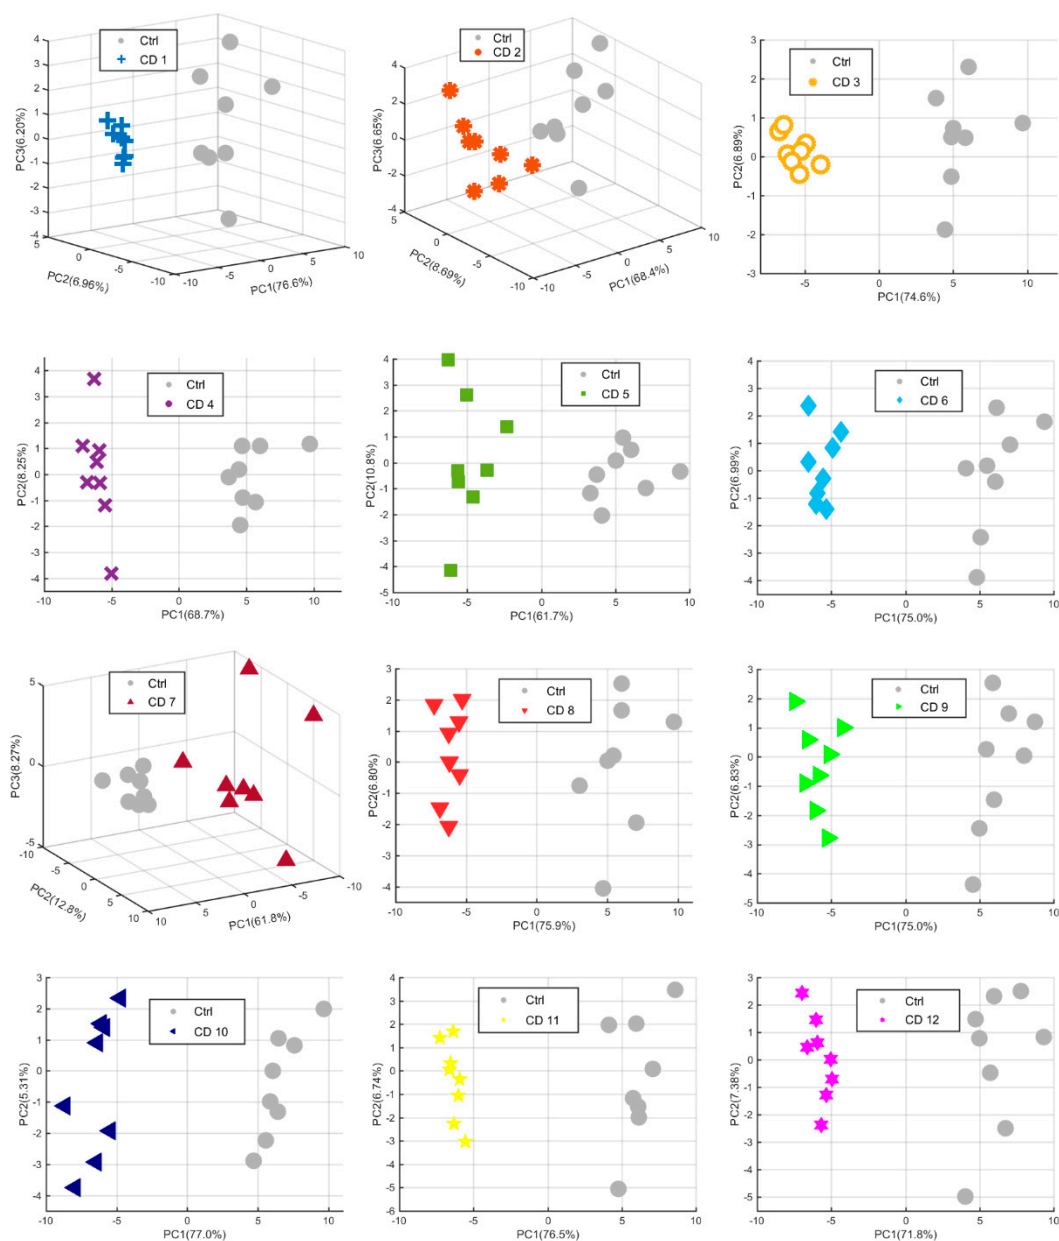

**Figure S3.** PCA scores plots of relative concentration of metabolites data from each coumarin derivative compared with control group.

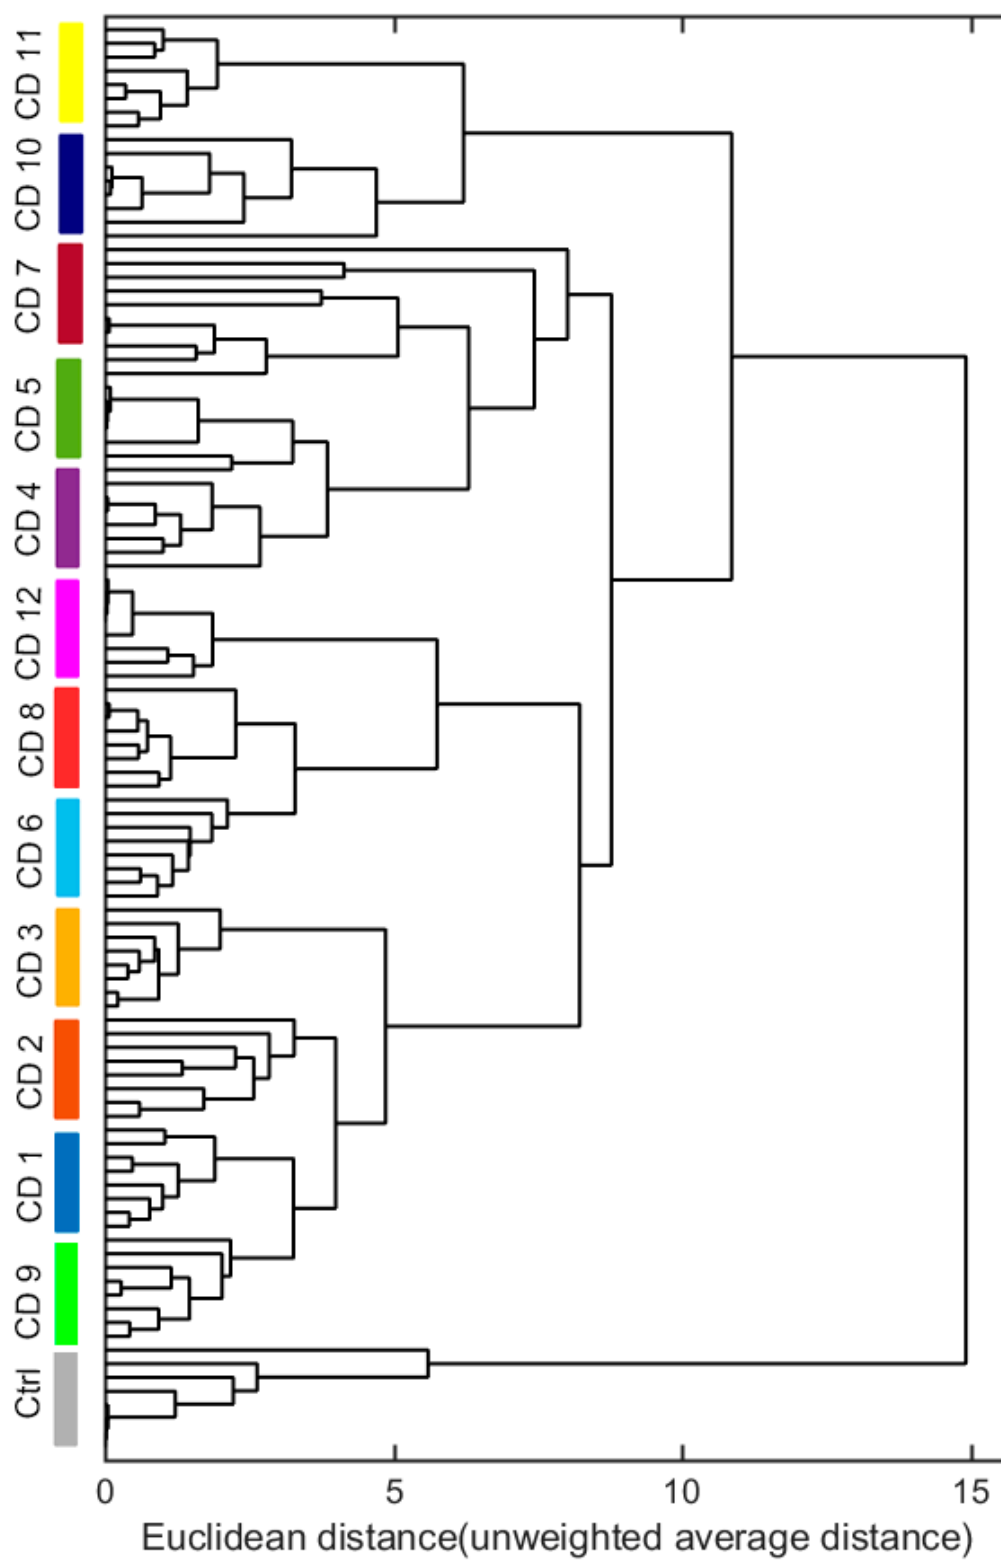

**Figure S4.** Result of HCA of relative concentration of metabolites data from twelve coumarin derivatives and control group.

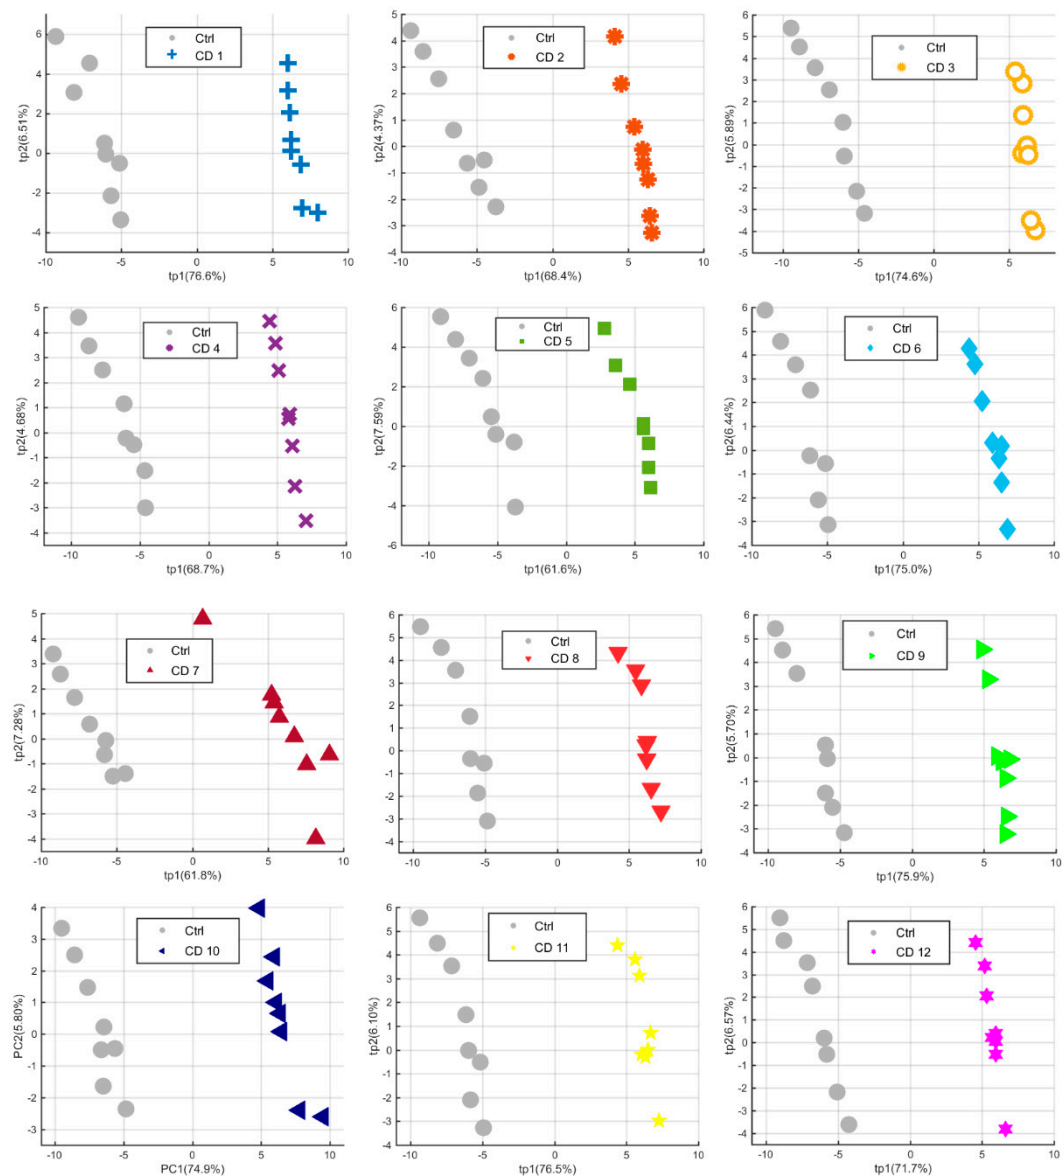

**Figure S5.** PLS-DA scores plot of relative concentration of metabolites data from each coumarin derivative compared with control group.

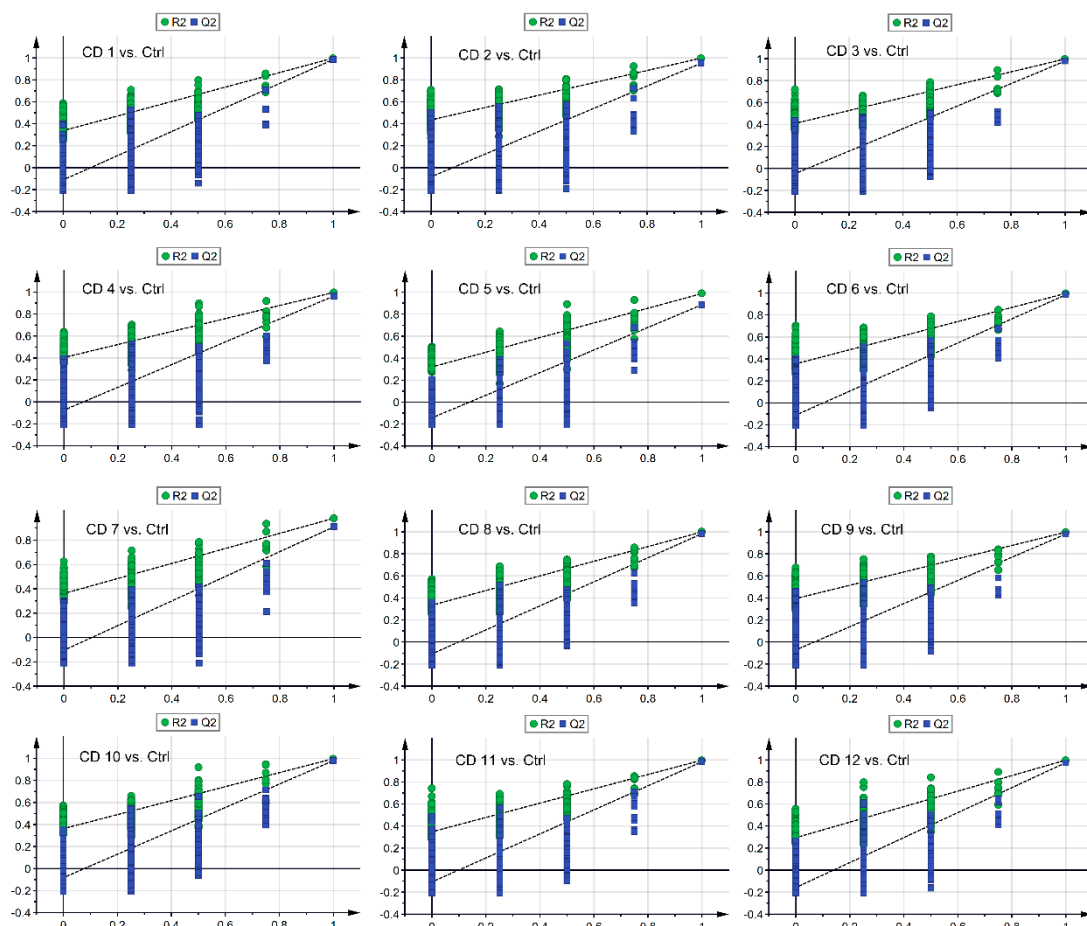

**Figure S6.** Corresponding permutation tests of PLS-DA models of relative concentration of metabolites data from each coumarin derivative compared with control group.

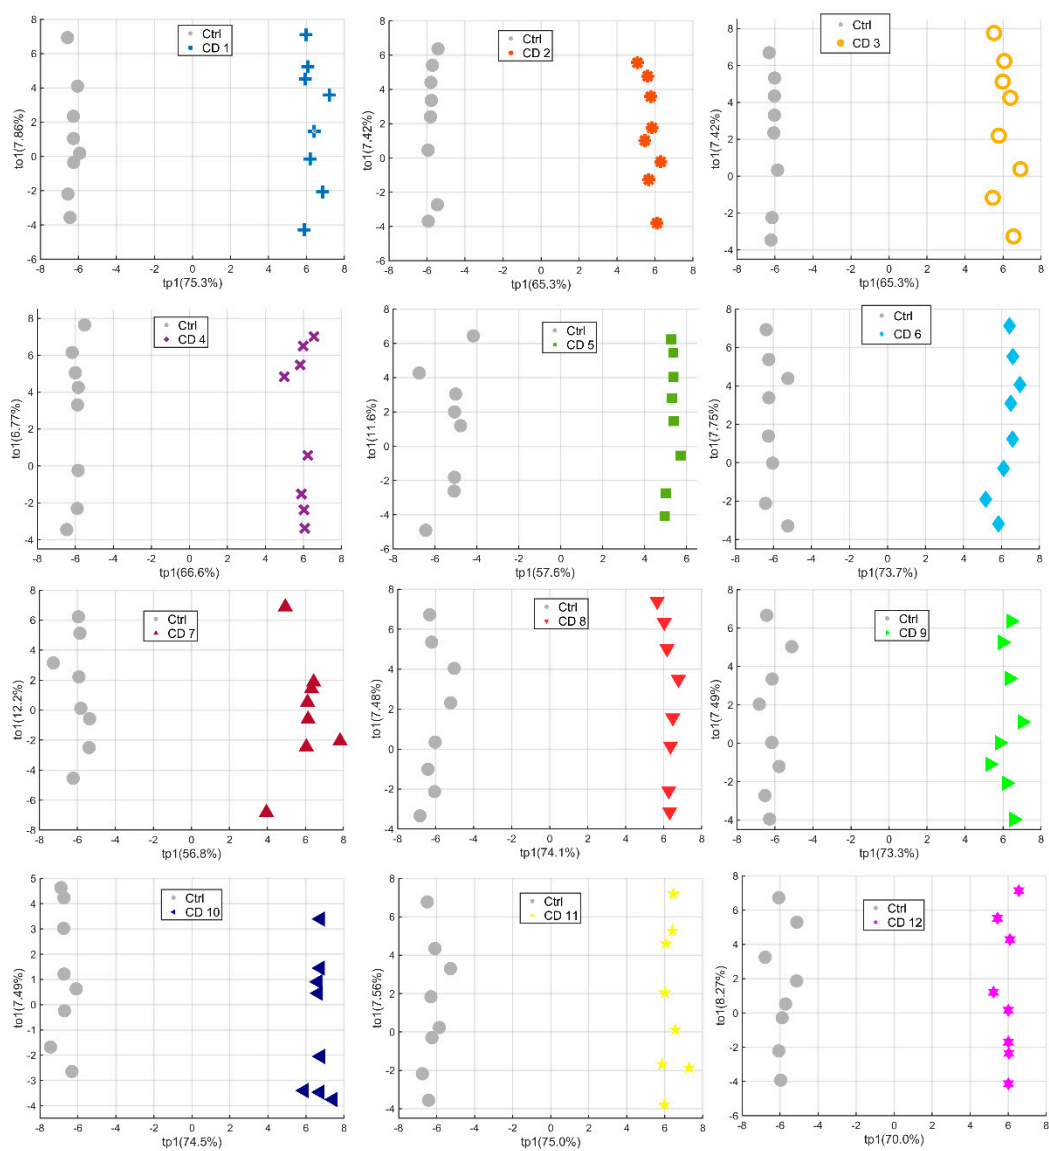

**Figure S7.** OPLS-DA scores plot of relative concentration of metabolites data from each coumarin derivative compared with control group.



**Table S1.** The IC<sub>50</sub> value of coumarin derivatives in the U251 cells

| No. | Compound structure                                                                  | IC <sub>50</sub> / $\mu\text{m}$ |
|-----|-------------------------------------------------------------------------------------|----------------------------------|
| CD1 | 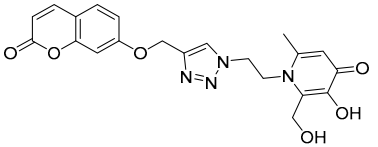   | 54.978                           |
| CD2 |    | 51.850                           |
| CD3 |    | 65.033                           |
| CD4 |   | 76.218                           |
| CD5 |  | 68.438                           |
| CD6 |  | 86.896                           |
| CD7 |  | 98.708                           |

|      |                                                                                     |        |
|------|-------------------------------------------------------------------------------------|--------|
| CD8  | 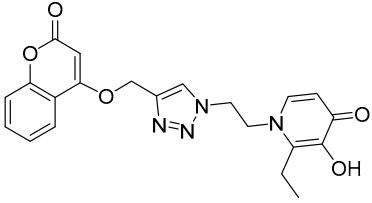   | 66.281 |
| CD9  |    | 87.534 |
| CD10 |    | 65.141 |
| CD11 |   | 82.009 |
| CD12 |  | 79.775 |

**Table S2.** The detailed information of twelve coumarin derivatives in our work.

| No. | Compound structure                                                                  | Data Representation                                                                                                                                                                                                                                                                                                                                                                                                                                                                                                                                                                                                                                                                                                                                                                                                                                                                                                |
|-----|-------------------------------------------------------------------------------------|--------------------------------------------------------------------------------------------------------------------------------------------------------------------------------------------------------------------------------------------------------------------------------------------------------------------------------------------------------------------------------------------------------------------------------------------------------------------------------------------------------------------------------------------------------------------------------------------------------------------------------------------------------------------------------------------------------------------------------------------------------------------------------------------------------------------------------------------------------------------------------------------------------------------|
| CD1 | 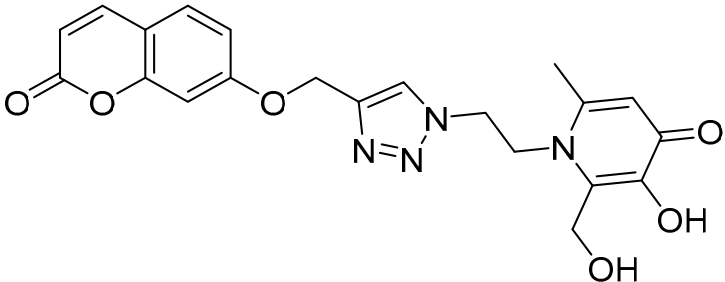  | <b>3-hydroxy-2-(hydroxymethyl)-6-methyl-1-(2-(4-(((2-oxo-2H-chromen-7-yl)oxy)methyl)-1H-1,2,3-triazol-1-yl)ethyl)pyridin-4(1H)-one:</b> yellow solid, yield: 81%; m.p.: 212-215 °C; <sup>1</sup> H NMR (600 MHz, DMSO- <i>d</i> <sub>6</sub> ) δ 8.32 (s, 1H), 8.02 (d, <i>J</i> = 9.5 Hz, 1H), 7.66 (d, <i>J</i> = 8.7 Hz, 1H), 7.15 (d, <i>J</i> = 2.5 Hz, 1H), 7.10 (s, 1H), 7.02 (dd, <i>J</i> = 8.6, 2.4 Hz, 1H), 6.32 (d, <i>J</i> = 9.5 Hz, 1H), 5.30 (s, 2H), 4.98 (d, <i>J</i> = 5.9 Hz, 2H), 4.95 (d, <i>J</i> = 5.9 Hz, 2H), 4.60 (s, 2H), 2.42 (s, 3H). <sup>13</sup> C NMR (151 MHz, DMSO- <i>d</i> <sub>6</sub> ) δ 161.4, 160.7, 160.6, 155.7, 149.6, 144.7, 142.9, 142.8, 142.6, 130.0, 126.3, 113.5, 113.3, 113.2, 113.1, 102.1, 61.9, 53.1, 50.5, 48.4, 20.1. HRMS (ESI) calcd for C <sub>21</sub> H <sub>21</sub> N <sub>4</sub> O <sub>6</sub> [M+H] <sup>+</sup> : 425.1456; found: 425.1439. |
| CD2 |  | <b>3-hydroxy-2,6-dimethyl-1-(2-(4-(((2-oxo-2H-chromen-7-yl)oxy)methyl)-1H-1,2,3-triazol-1-yl)ethyl)pyridin-4(1H)-one:</b> white solid, yield: 93%; m.p.: 256-249 °C; <sup>1</sup> H NMR (600 MHz, DMSO- <i>d</i> <sub>6</sub> ) δ 8.34 (s, 1H), 8.02 (d, <i>J</i> = 9.5 Hz, 1H), 7.66 (d, <i>J</i> = 8.6 Hz, 1H), 7.14 (s, 1H), 7.03 (s, 1H), 7.01 (dd, <i>J</i> = 8.6, 2.5 Hz, 1H), 6.32 (d, <i>J</i> = 9.5 Hz, 1H), 5.30 (s, 2H), 4.93 (t, <i>J</i> = 6.3 Hz, 2H), 4.80 (t, <i>J</i> = 6.2 Hz, 2H), 2.41 (s, 3H), 2.34 (s, 3H). <sup>13</sup> C NMR (151 MHz, DMSO- <i>d</i> <sub>6</sub> ) δ 161.4, 160.7, 159.1,                                                                                                                                                                                                                                                                                               |

|     |                                                                                     |                                                                                                                                                                                                                                                                                                                                                                                                                                                                                                                                                                                                                                                                                                                                                                                                                                                                                                            |
|-----|-------------------------------------------------------------------------------------|------------------------------------------------------------------------------------------------------------------------------------------------------------------------------------------------------------------------------------------------------------------------------------------------------------------------------------------------------------------------------------------------------------------------------------------------------------------------------------------------------------------------------------------------------------------------------------------------------------------------------------------------------------------------------------------------------------------------------------------------------------------------------------------------------------------------------------------------------------------------------------------------------------|
|     |                                                                                     | 155.7, 148.4, 144.8, 143.1, 142.9, 141.9, 130.0, 126.4, 113.4, 113.2, 113.1, 112.6, 102.1, 61.9, 51.1, 47.7, 20.3, 13.6. HRMS (ESI) calcd for C <sub>21</sub> H <sub>21</sub> N <sub>4</sub> O <sub>5</sub> [M+H] <sup>+</sup> : 409.1518; found: 409.1506.                                                                                                                                                                                                                                                                                                                                                                                                                                                                                                                                                                                                                                                |
| CD3 | 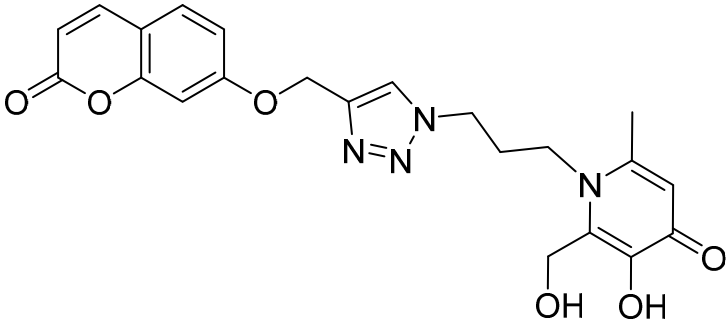  | <b>3-hydroxy-2-(hydroxymethyl)-6-methyl-1-(3-(4-(((2-oxo-2H-chromen-7-yl)oxy)methyl)-1H-1,2,3-triazol-1-yl)propyl)pyridin-4(1H)-one:</b> yellow solid, yield: 84%; m.p.: 189-192 °C; <sup>1</sup> H NMR (600 MHz, DMSO- <i>d</i> <sub>6</sub> ) δ 8.41 (s, 1H), 8.02 (d, <i>J</i> = 9.5 Hz, 1H), 7.66 (d, <i>J</i> = 8.6 Hz, 1H), 7.15 (s, 1H), 7.12 (s, 1H), 7.02 (d, <i>J</i> = 8.5 Hz, 1H), 6.31 (dd, <i>J</i> = 9.4, 1.7 Hz, 1H), 5.29 (s, 2H), 4.76 (s, 2H), 4.61 (t, <i>J</i> = 6.7 Hz, 2H), 4.45 (t, <i>J</i> = 8.5 Hz, 2H), 2.54 (s, 3H), 2.40 (dq, <i>J</i> = 13.3, 6.9 Hz, 2H). <sup>13</sup> C NMR (151 MHz, DMSO- <i>d</i> <sub>6</sub> ) δ 163.5, 161.5, 160.7, 160.0, 155.7, 148.8, 144.7, 142.7, 142.5, 142.3, 130.0, 125.5, 113.5, 113.3, 113.1, 102.0. HRMS (ESI) calcd for C <sub>22</sub> H <sub>23</sub> N <sub>4</sub> O <sub>6</sub> [M+H] <sup>+</sup> : 439.1612; found: 439.1606. |
| CD4 |  | <b>3-hydroxy-2,6-dimethyl-1-(3-(4-(((2-oxo-2H-chromen-7-yl)oxy)methyl)-1H-1,2,3-triazol-1-yl)propyl)pyridin-4(1H)-one:</b> white solid, yield: 87%; m.p.: 263-265 °C; <sup>1</sup> H NMR (600 MHz, DMSO- <i>d</i> <sub>6</sub> ) δ 8.43 (s, 1H), 8.01 (d, <i>J</i> = 9.4 Hz, 1H), 7.66 (d, <i>J</i> = 8.5 Hz, 1H), 7.15 (s, 1H), 7.06 (s, 1H), 7.02 (d, <i>J</i> = 8.7 Hz, 1H), 6.30 (d, <i>J</i> = 9.4 Hz, 1H), 5.30 (s, 2H), 4.62 (t, <i>J</i> = 6.7 Hz, 2H), 4.34-4.18 (m, 2H), 2.51 (d, <i>J</i> = 7.0                                                                                                                                                                                                                                                                                                                                                                                                 |

|     |                                                                                    |                                                                                                                                                                                                                                                                                                                                                                                                                                                                                                                                                                                                                                                                                                                                                                                                                                                                                                              |
|-----|------------------------------------------------------------------------------------|--------------------------------------------------------------------------------------------------------------------------------------------------------------------------------------------------------------------------------------------------------------------------------------------------------------------------------------------------------------------------------------------------------------------------------------------------------------------------------------------------------------------------------------------------------------------------------------------------------------------------------------------------------------------------------------------------------------------------------------------------------------------------------------------------------------------------------------------------------------------------------------------------------------|
|     |                                                                                    | Hz, 5H), 2.47 (s, 3H). $^{13}\text{C}$ NMR (151 MHz, DMSO- $d_6$ ) $\delta$ 161.5, 160.7, 158.6, 155.7, 147.6, 144.7, 142.6, 142.5, 141.8, 130.0, 125.6, 113.4, 113.1, 113.1, 112.6, 102.1, 62.2, 49.1, 47.1, 28.8, 20.3, 13.4. HRMS (ESI) calcd for $\text{C}_{22}\text{H}_{23}\text{N}_4\text{O}_5$ $[\text{M}+\text{H}]^+$ : 423.1663; found: 423.1676.                                                                                                                                                                                                                                                                                                                                                                                                                                                                                                                                                   |
| CD5 | 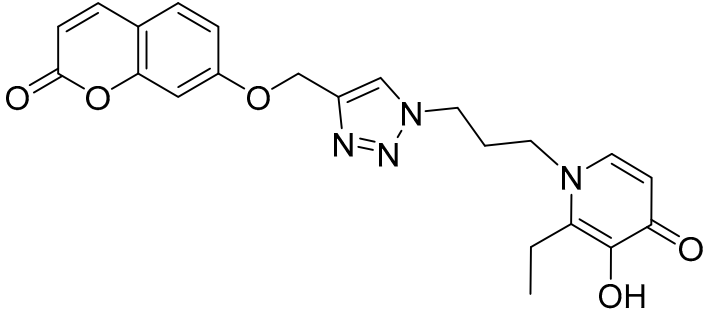 | <b>2-ethyl-3-hydroxy-1-(3-(4-(((2-oxo-2H-chromen-7-yl)oxy)methyl)-1H-1,2,3-triazol-1-yl)propyl)pyridin-4(1H)-one:</b> white solid, yield: 91%; m.p.: 204-206 °C; $^1\text{H}$ NMR (600 MHz, DMSO- $d_6$ ) $\delta$ 8.29 (s, 1H), 8.02 (d, $J$ = 9.5 Hz, 1H), 7.88 (d, $J$ = 7.1 Hz, 1H), 7.66 (d, $J$ = 8.6 Hz, 1H), 7.13 (d, $J$ = 2.4 Hz, 1H), 7.05 (d, $J$ = 6.6 Hz, 1H), 7.00 (dd, $J$ = 8.6, 2.4 Hz, 1H), 6.32 (d, $J$ = 9.5 Hz, 1H), 5.27 (s, 2H), 4.92 (dd, $J$ = 6.8, 4.5 Hz, 2H), 4.86 (d, $J$ = 5.8 Hz, 2H), 2.69 (q, $J$ = 7.4 Hz, 2H), 1.09 (t, $J$ = 7.5 Hz, 3H). $^{13}\text{C}$ NMR (151 MHz, DMSO- $d_6$ ) $\delta$ 161.4, 160.7, 159.5, 155.7, 146.9, 144.7, 143.2, 142.8, 138.8, 130.2, 126.7, 113.3, 113.2, 113.1, 111.3, 102.1, 61.9, 55.1, 49.8, 19.8, 12.1. HRMS (ESI) calcd for $\text{C}_{21}\text{H}_{21}\text{N}_4\text{O}_5$ $[\text{M}+\text{H}]^+$ : 409.1506; found: 409.1512. |

|     |                                                                                     |                                                                                                                                                                                                                                                                                                                                                                                                                                                                                                                                                                                                                                                                                                                                                                                                                                                                                                                                                                  |
|-----|-------------------------------------------------------------------------------------|------------------------------------------------------------------------------------------------------------------------------------------------------------------------------------------------------------------------------------------------------------------------------------------------------------------------------------------------------------------------------------------------------------------------------------------------------------------------------------------------------------------------------------------------------------------------------------------------------------------------------------------------------------------------------------------------------------------------------------------------------------------------------------------------------------------------------------------------------------------------------------------------------------------------------------------------------------------|
| CD6 | 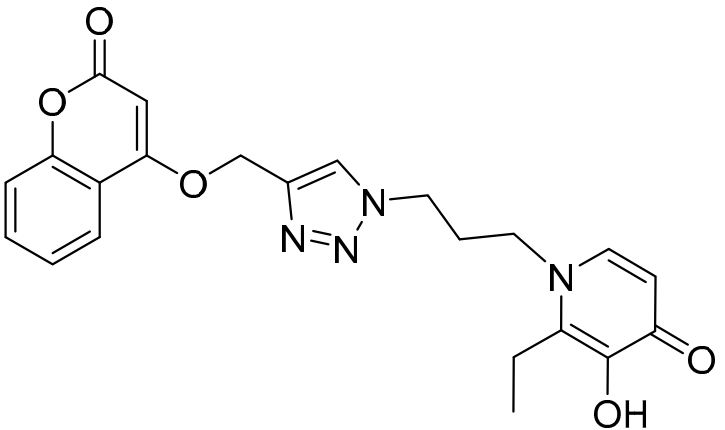  | <p><b>2-ethyl-3-hydroxy-1-(3-(4-(((2-oxo-2H-chromen-4-yl)oxy)methyl)-1H-1,2,3-triazol-1-yl)propyl)pyridin-4(1H)-one:</b> white solid, yield: 90%; m.p.: 192-195 °C; <sup>1</sup>H NMR (600 MHz, DMSO-<i>d</i><sub>6</sub>) δ 8.31 (s, 1H), 8.12 (d, <i>J</i> = 7.0 Hz, 1H), 7.65 (d, <i>J</i> = 7.8 Hz, 1H), 7.46 (d, <i>J</i> = 8.0 Hz, 1H), 7.38 (d, <i>J</i> = 8.4 Hz, 1H), 7.33 (t, <i>J</i> = 7.2 Hz, 1H), 7.18 (d, <i>J</i> = 7.2 Hz, 1H), 6.21 (s, 1H), 5.38 (s, 2H), 4.51 (t, <i>J</i> = 6.6 Hz, 2H), 4.41-4.37 (m, 2H), 2.87 (q, <i>J</i> = 7.5 Hz, 2H), 2.32–2.28 (m, 2H), 1.22 (t, <i>J</i> = 7.2 Hz, 3H). <sup>13</sup>C NMR (150 MHz, DMSO-<i>d</i><sub>6</sub>) δ 163.6, 161.5, 158.3, 152.8, 145.3, 141.7, 140.1, 138.5, 131.2, 126.7, 123.4, 125.1, 116.1, 114.6, 112.7, 92.7, 64.6, 51.2, 46.4, 30.8, 20.2, 12.5. HRMS (ESI) calcd for C<sub>22</sub>H<sub>23</sub>N<sub>4</sub>O<sub>5</sub> [M+H]<sup>+</sup>: 423.1815; found: 423.1826.</p> |
| CD7 |  | <p><b>5-hydroxy-2-methyl-1-(2-(4-(((2-oxo-2H-chromen-4-yl)oxy)methyl)-1H-1,2,3-triazol-1-yl)ethyl)pyridin-4(1H)-one:</b> white solid, yield: 86%; m.p.: 235-237°C; <sup>1</sup>H NMR (600 MHz, DMSO-<i>d</i><sub>6</sub>) δ 8.30 (s, 1H), 8.01 (d, <i>J</i> = 9.6 Hz, 1H), 7.88 (d, <i>J</i> = 7.2 Hz, 1H), 7.65 (d, <i>J</i> = 8.4 Hz, 1H), 7.12 (d, <i>J</i> = 1.6 Hz, 1H), 7.05 (d, <i>J</i> = 7.2 Hz, 1H), 6.99 (dd, <i>J</i> = 2.0, 8.4 Hz, 1H), 6.30 (d, <i>J</i> = 9.2 Hz, 1H), 5.26 (s, 2H), 4.92 (d, <i>J</i> = 6.0 Hz, 4H), 2.40 (s, 3H); <sup>13</sup>C NMR (150 MHz, DMSO-<i>d</i><sub>6</sub>) δ 164.7, 161.9, 160.5, 153.2, 148.0, 144.2, 141.6, 133.3, 131.7, 125.7, 124.7, 123.3, 116.9, 115.5,</p>                                                                                                                                                                                                                                              |

|     |                                                                                    |                                                                                                                                                                                                                                                                                                                                                                                                                                                                                                                                                                                                                                                                                                                                                                                                                                                                                                                                                            |
|-----|------------------------------------------------------------------------------------|------------------------------------------------------------------------------------------------------------------------------------------------------------------------------------------------------------------------------------------------------------------------------------------------------------------------------------------------------------------------------------------------------------------------------------------------------------------------------------------------------------------------------------------------------------------------------------------------------------------------------------------------------------------------------------------------------------------------------------------------------------------------------------------------------------------------------------------------------------------------------------------------------------------------------------------------------------|
|     |                                                                                    | 114.5, 91.8, 63.2, 53.1, 47.0, 30.1, 18.8. HRMS (ESI) calcd for C <sub>20</sub> H <sub>19</sub> N <sub>4</sub> O <sub>5</sub> [M+H] <sup>+</sup> : 395.1315; found: 395.1321.                                                                                                                                                                                                                                                                                                                                                                                                                                                                                                                                                                                                                                                                                                                                                                              |
| CD8 | 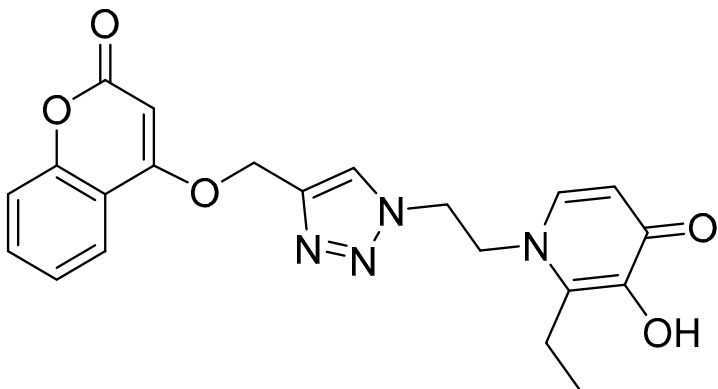 | <p><b>2-ethyl-3-hydroxy-1-(2-(4-(((2-oxo-2H-chromen-4-yl)oxy)methyl)-1H-1,2,3-triazol-1-yl)ethyl)pyridin-4(1H)-one</b>; white solid, yield: 90%; m.p.: 253-256 °C <sup>1</sup>H NMR (600 MHz, DMSO-<i>d</i><sub>6</sub>) δ 8.31 (s, 1H), 8.13 (d, <i>J</i> = 7.0 Hz, 1H), 7.81 (d, <i>J</i> = 7.8 Hz, 1H), 7.63 (dd, <i>J</i> = 8.4, 7.2, Hz, 1H), 7.41 (d, <i>J</i> = 8.4 Hz, 1H), 7.31 (t, <i>J</i> = 7.2 Hz, 1H), 7.18 (d, <i>J</i> = 7.2 Hz, 1H), 6.18 (s, 1H), 5.45 (s, 2H), 4.58 (t, <i>J</i> = 6.9 Hz, 2H), 2.87 (q, <i>J</i> = 7.5 Hz, 2H), 2.44 (t, <i>J</i> = 6.6 Hz, 2H), 1.11 (t, <i>J</i> = 7.5 Hz, 3H). <sup>13</sup>C NMR (150 MHz, DMSO-<i>d</i><sub>6</sub>) δ 167.1, 163.0, 159.3, 152.2, 145.6, 143.8, 140.7, 138.2, 133.7, 126.1, 124.3, 123.3, 116.7, 111.6, 110.7, 91.3, 62.3, 51.3, 47.3, 32.1, 12.6. HRMS (ESI) calcd for C<sub>21</sub>H<sub>21</sub>N<sub>4</sub>O<sub>5</sub> [M+H]<sup>+</sup>: 409.1506; found: 409.1500.</p> |

|      |                                                                                     |                                                                                                                                                                                                                                                                                                                                                                                                                                                                                                                                                                                                                                                                                                                                                                                                                                                                                                   |
|------|-------------------------------------------------------------------------------------|---------------------------------------------------------------------------------------------------------------------------------------------------------------------------------------------------------------------------------------------------------------------------------------------------------------------------------------------------------------------------------------------------------------------------------------------------------------------------------------------------------------------------------------------------------------------------------------------------------------------------------------------------------------------------------------------------------------------------------------------------------------------------------------------------------------------------------------------------------------------------------------------------|
| CD9  | 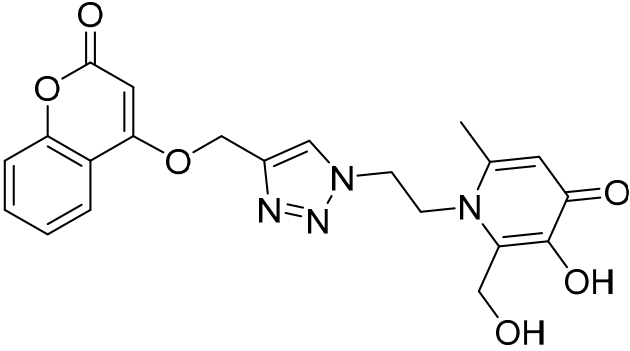   | <p><b>3-hydroxy-2-(hydroxymethyl)-6-methyl-1-(2-(4-(((2-oxo-2H-chromen-4-yl)oxy)methyl)-1H-1,2,3-triazol-1-yl)ethyl)pyridin-4(1H)-one:</b> white solid, yield: 89%; m.p.: 142-148 °C; <sup>1</sup>H NMR (600 MHz, DMSO-<i>d</i><sub>6</sub>) δ 8.35 (s, 1H), 8.07 (d, <i>J</i> = 8.4 Hz, 1H), 7.71 (d, <i>J</i> = 8.4 Hz, 1H), 7.35 (d, <i>J</i> = 6.6 Hz, 1H), 7.26 (s, 1H), 7.13 (d, <i>J</i> = 8.4 Hz, 1H), 6.21 (d, <i>J</i> = 8.4 Hz, 1H), 5.43 (s, 2H), 4.95 (d, <i>J</i> = 6.0 Hz, 2H), 4.72 (d, <i>J</i> = 6.0 Hz, 2H), 4.60 (s, 2H), 2.36 (s, 3H). <sup>13</sup>C NMR (150 MHz, DMSO-<i>d</i><sub>6</sub>) δ 165.3, 162.1, 161.4, 152.7, 141.7, 144.5, 143.1, 142.7, 142.3, 131.1, 128.6, 111.4, 113.3, 112.0, 113.1, 101.5, 63.7, 52.9, 50.3, 47.4, 20.5. HRMS (ESI) calcd for C<sub>21</sub>H<sub>21</sub>N<sub>4</sub>O<sub>6</sub> [M+H]<sup>+</sup>: 425.1415; found: 425.1418.</p> |
| CD10 |  | <p><b>3-hydroxy-2-(hydroxymethyl)-6-methyl-1-(2-(4-(((2-oxo-2H-chromen-3-yl)oxy)methyl)-1H-1,2,3-triazol-1-yl)ethyl)pyridin-4(1H)-one:</b> white solid, yield: 85%; m.p.: 168-170 °C; <sup>1</sup>H NMR (600 MHz, DMSO-<i>d</i><sub>6</sub>) δ 8.40 (s, 1H), 7.93 (d, <i>J</i> = 7.0 Hz, 1H), 7.72 (d, <i>J</i> = 7.9 Hz, 1H), 7.68 (t, <i>J</i> = 7.6 Hz, 1H), 7.42 (d, <i>J</i> = 8.4 Hz, 1H), 7.38 (t, <i>J</i> = 7.6 Hz, 1H), 7.08 (d, <i>J</i> = 6.9 Hz, 1H), 6.12 (s, 1H), 5.43 (s, 2H), 4.96 (t, <i>J</i> = 6 Hz, 2H), 4.89 (t, <i>J</i> = 6 Hz, 2H), 2.73 (q, <i>J</i> = 7.8 Hz, 2H), 1.10 (t, <i>J</i> = 7.4 Hz, 3H). NMR (150 MHz, DMSO-<i>d</i><sub>6</sub>) δ 165.7, 163.8, 160.5, 151.1, 142.8, 145.1, 142.7, 146.2, 141.5, 131.9, 128.4, 110.3, 113.5, 113.8, 111.9, 101.7,</p>                                                                                                     |



|      |                                                                                     |                                                                                                                                                                                                                                                                                                                                                                                                                                                                                                                                                                                                                                                                                                                                                                                                                                                                              |
|------|-------------------------------------------------------------------------------------|------------------------------------------------------------------------------------------------------------------------------------------------------------------------------------------------------------------------------------------------------------------------------------------------------------------------------------------------------------------------------------------------------------------------------------------------------------------------------------------------------------------------------------------------------------------------------------------------------------------------------------------------------------------------------------------------------------------------------------------------------------------------------------------------------------------------------------------------------------------------------|
|      |                                                                                     | 63.4, 52.1, 50.4, 45.1, 20.6. HRMS (ESI) calcd for C <sub>21</sub> H <sub>21</sub> N <sub>4</sub> O <sub>5</sub> [M+H] <sup>+</sup> : 409.1612; found: 409.1607.                                                                                                                                                                                                                                                                                                                                                                                                                                                                                                                                                                                                                                                                                                             |
| CD11 | 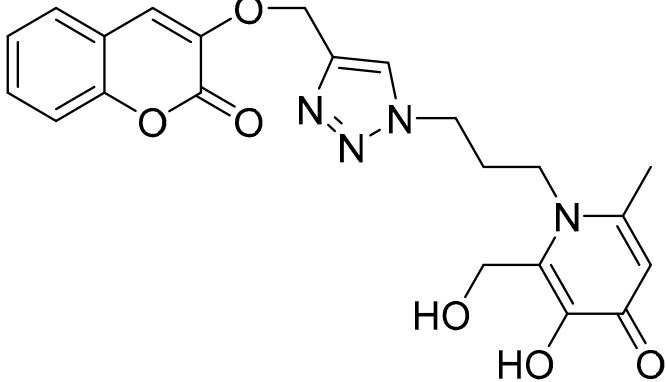  | <b>2-ethyl-3-hydroxy-1-(3-(4-(((2-oxo-2H-chromen-3-yl)oxy)methyl)-1H-1,2,3-triazol-1-yl)propyl)pyridin-4(1H)-one:</b> white solid, yield: 92%; m.p.: 195-198 °C; <sup>1</sup> H NMR (600 MHz, DMSO- <i>d</i> <sub>6</sub> ) δ 8.49 (s, 1H), 7.76 (d, <i>J</i> = 8.0 Hz, 1H), 7.67 (t, <i>J</i> = 7.2 Hz, 1H), 7.42 (d, <i>J</i> = 7.2 Hz, 1H), 7.35 (t, <i>J</i> = 7.8 Hz, 1H), 7.11 (s, 1H), 6.17 (s, 1H), 5.46 (s, 2H), 4.76 (s, 2H), 4.63 (t, <i>J</i> = 6.6 Hz, 2H), 2.56 (s, 3H), 2.55 (s, 2H), 2.39-2.45 (m, 2H). <sup>13</sup> C NMR (150 MHz, DMSO- <i>d</i> <sub>6</sub> ) δ 166.4, 165.7, 160.3, 154.2, 140.8, 143.6, 142.7, 141.9, 141.2, 130.7, 128.5, 122.5, 117.1, 116.5, 112.3, 103.7, 63.3, 51.5, 50.2, 46.8, 31.2. 19.2. HRMS (ESI) calcd for C <sub>22</sub> H <sub>23</sub> N <sub>4</sub> O <sub>6</sub> [M+H] <sup>+</sup> : 439.1616; found: 439.1603. |
| CD12 |  | <b>3-hydroxy-2-(hydroxymethyl)-6-methyl-1-(2-(4-(((2-oxo-2H-chromen-3-yl)oxy)methyl)-1H-1,2,3-triazol-1-yl)ethyl)pyridin-4(1H)-one:</b> white solid, yield: 85%; m.p.: 168-170 °C; <sup>1</sup> H NMR (600 MHz, DMSO- <i>d</i> <sub>6</sub> ) δ 8.40 (s, 1H), 7.93 (d, <i>J</i> = 7.0 Hz, 1H), 7.72 (d, <i>J</i> = 7.9 Hz, 1H), 7.68 (t, <i>J</i> = 7.6 Hz, 1H), 7.42 (d, <i>J</i> = 8.4 Hz, 1H), 7.38 (t, <i>J</i> = 7.6 Hz, 1H), 7.08 (d, <i>J</i> = 6.9 Hz, 1H), 6.12 (s, 1H), 5.43 (s, 2H), 4.96 (t, <i>J</i> = 6 Hz, 2H), 4.89 (t, <i>J</i> = 6 Hz, 2H), 2.73 (q, <i>J</i> = 7.8 Hz, 2H), 1.10 (t, <i>J</i> = 7.4 Hz,                                                                                                                                                                                                                                                   |

---

|  |  |                                                                                                                                                                                                                                                                                                                                            |
|--|--|--------------------------------------------------------------------------------------------------------------------------------------------------------------------------------------------------------------------------------------------------------------------------------------------------------------------------------------------|
|  |  | 3H). NMR (150 MHz, DMSO- <i>d</i> <sub>6</sub> ) $\delta$ 165.7, 163.8, 160.5, 151.1, 142.8, 145.1, 142.7, 146.2, 141.5, 131.9, 128.4, 110.3, 113.5, 113.8, 111.9, 101.7, 63.4, 52.1, 50.4, 45.1, 20.6. HRMS (ESI) calcd for C <sub>21</sub> H <sub>21</sub> N <sub>4</sub> O <sub>5</sub> [M+H] <sup>+</sup> : 409.1612; found: 409.1607. |
|--|--|--------------------------------------------------------------------------------------------------------------------------------------------------------------------------------------------------------------------------------------------------------------------------------------------------------------------------------------------|

**Table S3.** The tagged chemical shifts (ppm) and function groups from the indicated metabolites

| No. | HMDB No.    | Metabolites Name     | Tagged chemical shift (ppm) | Function groups                   |
|-----|-------------|----------------------|-----------------------------|-----------------------------------|
| 1   | HMDB0001857 | 1,3-dimethylurate    | 3.308                       | CH <sub>3</sub>                   |
| 2   | HMDB0001860 | 1,7-dimethylxanthine | 7.830                       | NH                                |
| 3   | HMDB0000008 | 2-hydroxybutyrate    | 0.887                       | CH <sub>3</sub>                   |
| 4   | HMDB0000694 | 2-hydroxyglutarate   | 4.017                       | CH <sub>2</sub>                   |
| 5   | HMDB0001863 | 2-hydroxyvalerate    | 0.900                       | CH <sub>3</sub>                   |
| 6   | HMDB0000208 | 2-oxoglutarate       | 2.429, 2.997                | CH <sub>2</sub> , CH <sub>2</sub> |
| 7   | HMDB0000357 | 3-hydroxybutyrate    | 1.188                       | CH <sub>3</sub>                   |
| 8   | HMDB0000042 | acetate              | 1.908                       | CH <sub>3</sub>                   |
| 9   | HMDB0000060 | acetoacetate         | 2.272                       | CH <sub>3</sub>                   |
| 10  | HMDB0001659 | acetone              | 2.225                       | CH <sub>3</sub>                   |
| 11  | HMDB0001341 | ADP                  | 8.254, 8.507                | NH                                |
| 12  | HMDB0000161 | alanine              | 1.469                       | CH <sub>3</sub>                   |
| 13  | HMDB0000045 | AMP                  | 8.247, 8.576                | NH                                |
| 14  | HMDB0000191 | aspartate            | 2.669, 2.801                | CH <sub>2</sub>                   |
| 15  | HMDB0000538 | ATP                  | 8.245, 8.500                | NH                                |
| 16  | HMDB0000043 | betaine              | 3.252                       | CH <sub>3</sub>                   |
| 17  | HMDB0000039 | butyrate             | 0.882                       | CH <sub>3</sub>                   |
| 18  | HMDB0000097 | choline              | 3.189                       | CH <sub>3</sub>                   |
| 19  | HMDB0000094 | citrate              | 2.526                       | CH <sub>3</sub>                   |
| 20  | HMDB0000193 | isocitrate           | 2.990                       | CH <sub>3</sub>                   |
| 21  | HMDB0000064 | creatine             | 3.025                       | CH <sub>3</sub>                   |
| 22  | HMDB0000064 | creatine phosphate   | 3.940                       | CH <sub>3</sub>                   |
| 23  | HMDB0000562 | creatinine           | 4.047                       | CH <sub>3</sub>                   |
| 24  | HMDB0000087 | dimethylamine        | 2.715                       | CH <sub>3</sub>                   |
| 25  | HMDB0000108 | ethanol              | 1.173                       | CH <sub>3</sub>                   |
| 26  | HMDB0001887 | ethylene glycol      | 3.662                       | CH <sub>3</sub>                   |
| 27  | HMDB0000142 | formate              | 8.444                       | H                                 |
| 28  | HMDB0000134 | fumarate             | 6.509                       | =CH                               |
| 29  | HMDB0000107 | galactitol           | 3.688                       | CH                                |
| 30  | HMDB0000122 | glucose              | 4.637, 5.226                | CH                                |
| 31  | HMDB0000148 | glutamate            | 2.348                       | CH <sub>2</sub>                   |
| 32  | HMDB0000641 | glutamine            | 2.445                       | CH <sub>2</sub>                   |
| 33  | HMDB0000125 | glutathione          | 2.965                       | CH <sub>2</sub>                   |
| 34  | HMDB0000123 | glycine              | 3.575                       | CH <sub>2</sub>                   |
| 35  | HMDB0000128 | guanidoacetate       | 3.785                       | CH <sub>2</sub>                   |

---

|    |             |                          |                     |                                   |
|----|-------------|--------------------------|---------------------|-----------------------------------|
| 36 | HMDB0000177 | histidine                | 7.082, 7.822        | =CH                               |
| 37 | HMDB0000157 | hypoxanthine             | 8.179, 8.201        | =CH                               |
| 38 | HMDB0000195 | inosine                  | 8.224, 8.333        | =CH                               |
| 39 | HMDB0000172 | isoleucine               | 0.926, 0.998        | CH <sub>3</sub> , CH <sub>2</sub> |
| 40 | HMDB0000190 | lactate                  | 4.118               | CH                                |
| 41 | HMDB0000687 | leucine                  | 0.948               | CH <sub>3</sub>                   |
| 42 | HMDB0000182 | lysine                   | 1.715               | CH <sub>2</sub>                   |
| 43 | HMDB0000691 | malonate                 | 3.119               | CH <sub>2</sub>                   |
| 44 | HMDB0001138 | N-acetylglutamate        | 2.021               | CH <sub>3</sub>                   |
| 45 | HMDB0006029 | N-acetylglutamine        | 2.025               | CH <sub>3</sub>                   |
| 46 | HMDB0000532 | N-acetylglycine          | 2.028               | CH <sub>3</sub>                   |
| 47 | HMDB0000902 | NAD <sup>+</sup>         | 9.329               | CH                                |
| 48 | HMDB0001406 | niacinamide              | 8.929               | NH <sub>2</sub>                   |
| 49 | HMDB0001565 | phosphocholine           | 3.206               | CH <sub>3</sub>                   |
| 50 | HMDB0000210 | pantothenate             | 0.883, 0.918        | CH <sub>3</sub>                   |
| 51 | HMDB0000159 | phenylalanine            | 7.318, 7.367, 7.419 | CH                                |
| 52 | HMDB0000243 | pyruvate                 | 2.363               | CH <sub>3</sub>                   |
| 53 | HMDB0000086 | glycero-3-phosphocholine | 3.215               | CH <sub>3</sub>                   |
| 54 | HMDB0000254 | succinate                | 2.394               | CH <sub>2</sub>                   |
| 55 | HMDB0000251 | taurine                  | 3.417               | CH <sub>2</sub>                   |
| 56 | HMDB0000925 | trimethylamine-N-oxide   | 3.253               | CH <sub>3</sub>                   |
| 57 | HMDB0000158 | tyrosine                 | 6.887, 7.182        | CH                                |
| 58 | HMDB0000883 | valine                   | 1.030               | CH <sub>3</sub>                   |

---

**Table S4.** Detailed statistical information for each group of differential metabolites.

| CD1 vs. Ctrl   |        |         |        |         |
|----------------|--------|---------|--------|---------|
|                | p      | FC      | VIP    | p(corr) |
| glycine        | 0.0004 | 1.2891  | 1.4341 | 0.8899  |
| guanidoacetate | 0.0131 | 1.1860  | 1.0232 | 0.6426  |
| lysine         | 0.0234 | 1.1903  | 1.1271 | 0.5334  |
| aspartate      | 0.0037 | -1.1800 | 1.1183 | -0.7673 |
| galactitol     | 0.0481 | -1.1578 | 1.2110 | -0.6207 |
| taurine        | 0.0323 | -1.1877 | 1.2788 | -0.6144 |
| CD2 vs. Ctrl   |        |         |        |         |
|                | p      | r       | VIP    | p(corr) |
| galactitol     | 0.0469 | 1.1739  | 1.1184 | 0.5297  |
| glutamate      | 0.0264 | 1.3199  | 1.9076 | 0.7066  |
| glutamine      | 0.0156 | 1.2160  | 1.4088 | 0.5259  |
| taurine        | 0.0004 | -1.2242 | 1.4384 | -0.7824 |
| inosine        | 0.0052 | -1.1828 | 1.1209 | -0.9053 |
| lysine         | 0.0099 | -1.1788 | 1.3903 | -0.6761 |
| CD3 vs. Ctrl   |        |         |        |         |
|                | p      | FC      | VIP    | p(corr) |
| phenylalanine  | 0.0000 | 1.2826  | 1.3158 | 0.8671  |
| glutamate      | 0.0135 | 1.3637  | 1.8608 | 0.6218  |
| glutamine      | 0.0076 | 1.3618  | 2.0673 | 0.6957  |
| NAD+           | 0.0347 | 1.2587  | 1.6972 | 0.6305  |
| taurine        | 0.0000 | -1.7013 | 2.9456 | -0.9636 |
| aspartate      | 0.0000 | -1.1881 | 1.6817 | -0.9370 |
| lysine         | 0.0080 | -1.2176 | 1.1799 | -0.6805 |
| CD4 vs. Ctrl   |        |         |        |         |
|                | p      | FC      | VIP    | p(corr) |
| galactitol     | 0.0000 | 1.7099  | 1.4126 | 0.9057  |
| glutamate      | 0.0010 | 1.6298  | 1.3248 | 0.8152  |
| glutamine      | 0.0007 | 1.9457  | 1.5801 | 0.8393  |
| glutathione    | 0.0015 | 10.5329 | 2.9545 | 0.8150  |
| NAD+           | 0.0001 | 2.1130  | 1.6017 | 0.7937  |
| taurine        | 0.0000 | -2.3755 | 1.8588 | -0.9813 |
| lysine         | 0.0000 | -1.6173 | 1.3681 | -0.9545 |
| CD5 vs. Ctrl   |        |         |        |         |
|                | p      | FC      | VIP    | p(corr) |
| glutamate      | 0.0013 | 1.7729  | 1.2967 | 0.4243  |
| glutamine      | 0.0011 | 2.1033  | 1.5150 | 0.9699  |
| ADP            | 0.0002 | 1.4419  | 1.0858 | 0.8865  |
| taurine        | 0.0000 | -2.2449 | 1.7107 | -0.9668 |
| lactate        | 0.0222 | -1.9491 | 1.2174 | -0.5926 |

| CD6 vs. Ctrl   |        |         |        |         |
|----------------|--------|---------|--------|---------|
|                | p      | FC      | VIP    | p(corr) |
| glycine        | 0.0000 | 1.1602  | 1.2528 | 0.8705  |
| lactate        | 0.0230 | 1.7565  | 2.0297 | 0.6077  |
| aspartate      | 0.0000 | -1.2253 | 1.4525 | -0.9353 |
| taurine        | 0.0000 | -1.3156 | 1.6988 | -0.8718 |
| glutathione    | 0.0458 | -1.8059 | 2.1434 | -0.6081 |
| CD7 vs. Ctrl   |        |         |        |         |
|                | p      | FC      | VIP    | p(corr) |
| glutamate      | 0.0048 | 2.2818  | 1.6714 | 0.7408  |
| glutamine      | 0.0017 | 2.0868  | 1.7074 | 0.8359  |
| glutathione    | 0.0436 | 5.4437  | 2.7678 | 0.6284  |
| lactate        | 0.0439 | 7.4065  | 2.9879 | 0.5870  |
| taurine        | 0.0000 | -1.6553 | 1.4108 | -0.9416 |
| inosine        | 0.0005 | -1.3202 | 1.0602 | -0.8677 |
| CD8 vs. Ctrl   |        |         |        |         |
|                | p      | FC      | VIP    | p(corr) |
| phenylalanine  | 0.0007 | 1.2713  | 1.0910 | 0.7036  |
| glutamate      | 0.0408 | 1.2283  | 1.9236 | 0.5611  |
| lactate        | 0.0380 | 2.1439  | 3.9894 | 0.5583  |
| taurine        | 0.0000 | -1.3363 | 2.5242 | -0.8967 |
| aspartate      | 0.0000 | -1.1715 | 1.9275 | -0.9245 |
| CD9 vs. Ctrl   |        |         |        |         |
|                | p      | FC      | VIP    | p(corr) |
| galactitol     | 0.0033 | 3.5407  | 1.6754 | 0.7464  |
| glutathione    | 0.0000 | 26.6600 | 2.8216 | 0.9351  |
| glycine        | 0.0000 | 3.0527  | 1.6592 | 0.9629  |
| guanidoacetate | 0.0000 | 2.6467  | 1.5585 | 0.9734  |
| ethanol        | 0.0000 | 3.2240  | 1.7033 | 0.9809  |
| aspartate      | 0.0000 | -1.6037 | 1.0783 | -0.9844 |
| taurine        | 0.0000 | -2.0226 | 1.3253 | -0.9890 |
| inosine        | 0.0000 | -1.8396 | 1.2343 | -0.9908 |
| glutamate      | 0.0000 | -2.6561 | 1.5144 | -0.8956 |
| lactate        | 0.0000 | -3.7449 | 1.7378 | -0.8381 |
| CD10 vs. Ctrl  |        |         |        |         |
|                | p      | FC      | VIP    | p(corr) |
| galactitol     | 0.0000 | 1.4696  | 1.4135 | 0.8900  |
| glutamate      | 0.0000 | 2.5836  | 2.3099 | 0.8945  |
| glutamine      | 0.0000 | 2.9352  | 2.5162 | 0.9211  |
| glutathione    | 0.0000 | 35.4889 | 4.5058 | 0.9305  |
| glycine        | 0.0050 | 1.3031  | 1.1898 | 0.7633  |
| guanidoacetate | 0.0003 | 1.2462  | 1.0552 | 0.8145  |
| butyrate       | 0.0002 | 1.2645  | 1.1557 | 0.8751  |

|                   |        |         |        |         |
|-------------------|--------|---------|--------|---------|
| ethanol           | 0.0001 | 1.3796  | 1.3377 | 0.9163  |
| leucine           | 0.0001 | 1.2226  | 1.0031 | 0.8273  |
| NAD+              | 0.0006 | -1.6655 | 1.6371 | -0.8757 |
| CD11 vs. Ctrl     |        |         |        |         |
|                   | p      | FC      | VIP    | p(corr) |
| taurine           | 0.0000 | 1.3117  | 2.1857 | 0.8085  |
| inosine           | 0.0148 | 1.3594  | 1.0711 | 0.7328  |
| lactate           | 0.0394 | -1.4575 | 3.0995 | -0.7218 |
| CD12 vs. Ctrl     |        |         |        |         |
|                   | p      | FC      | VIP    | p(corr) |
| phenylalanine     | 0.0000 | 1.3169  | 1.3661 | 0.9218  |
| 3-hydroxybutyrate | 0.0021 | 1.3813  | 1.1157 | 0.8541  |
| isoleucine        | 0.0025 | 1.2886  | 1.9347 | 0.7812  |
| lactate           | 0.0214 | 1.8251  | 2.5595 | 0.6218  |
| leucine           | 0.0037 | 1.4152  | 2.2915 | 0.7795  |
| lysine            | 0.0401 | 1.1815  | 1.4645 | 0.5843  |
| taurine           | 0.0000 | -1.5662 | 2.5460 | -0.9320 |
| aspartate         | 0.0000 | -1.2643 | 1.9503 | -0.9598 |
| glutamine         | 0.0428 | -1.2472 | 1.5466 | -0.5901 |

**Table S5.** The results of significantly disturbed metabolic pathways for each coumarin derivative affecting the cellular U251 metabolic pathways

|                                                     | Total | Expected | Hits | Raw p                 | -log(p) | Holmadjust            | FDR                   | Impact |
|-----------------------------------------------------|-------|----------|------|-----------------------|---------|-----------------------|-----------------------|--------|
| CD1 vs. Ctrl                                        |       |          |      |                       |         |                       |                       |        |
| Aminoacyl-tRNA biosynthesis                         | 48    | 0.19     | 3    | $5.23 \times 10^{-4}$ | 3.28    | $4.39 \times 10^{-2}$ | $4.39 \times 10^{-2}$ | 0.10   |
| Glycine, serine and threonine metabolism            | 33    | 0.13     | 2    | $6.25 \times 10^{-3}$ | 2.20    | $5.19 \times 10^{-1}$ | $2.63 \times 10^{-1}$ | 0.23   |
| Taurine and hypotaurine metabolism                  | 8     | 0.03     | 1    | $3.06 \times 10^{-2}$ | 1.51    | 1.00                  | $6.19 \times 10^{-1}$ | 0.33   |
| CD2 vs. Ctrl                                        |       |          |      |                       |         |                       |                       |        |
| D-Glutamine and D-glutamate metabolism              | 6     | 0.02     | 2    | $1.86 \times 10^{-4}$ | 3.73    | $1.56 \times 10^{-2}$ | $7.82 \times 10^{-3}$ | 0.25   |
| Aminoacyl-tRNA biosynthesis                         | 48    | 0.19     | 3    | $5.23 \times 10^{-4}$ | 3.28    | $4.29 \times 10^{-2}$ | $1.46 \times 10^{-2}$ | 0.10   |
| Arginine biosynthesis                               | 14    | 0.05     | 2    | $1.11 \times 10^{-3}$ | 2.95    | $9.02 \times 10^{-2}$ | $2.34 \times 10^{-2}$ | 0.19   |
| Alanine, aspartate and glutamate metabolism         | 28    | 0.11     | 2    | $4.52 \times 10^{-3}$ | 2.35    | $3.61 \times 10^{-1}$ | $7.59 \times 10^{-2}$ | 0.28   |
| Taurine and hypotaurine metabolism                  | 8     | 0.03     | 1    | $3.06 \times 10^{-2}$ | 1.51    | 1.00                  | $3.22 \times 10^{-1}$ | 0.33   |
| CD3 vs. Ctrl                                        |       |          |      |                       |         |                       |                       |        |
| Aminoacyl-tRNA biosynthesis                         | 48    | 0.22     | 5    | $4.63 \times 10^{-7}$ | 6.33    | $3.89 \times 10^{-5}$ | $3.89 \times 10^{-5}$ | 0.17   |
| Arginine biosynthesis                               | 14    | 0.06     | 3    | $2.01 \times 10^{-5}$ | 4.70    | $1.67 \times 10^{-3}$ | $8.46 \times 10^{-4}$ | 0.25   |
| Alanine, aspartate and glutamate metabolism         | 28    | 0.13     | 3    | $1.76 \times 10^{-4}$ | 3.75    | $1.45 \times 10^{-2}$ | $4.37 \times 10^{-3}$ | 0.47   |
| D-Glutamine and D-glutamate metabolism              | 6     | 0.03     | 2    | $2.60 \times 10^{-4}$ | 3.58    | $2.11 \times 10^{-2}$ | $4.37 \times 10^{-3}$ | 0.50   |
| Phenylalanine, tyrosine and tryptophan biosynthesis | 4     | 0.02     | 1    | $1.80 \times 10^{-2}$ | 1.75    | 1.00                  | $1.68 \times 10^{-1}$ | 0.50   |
| CD4 vs. Ctrl                                        |       |          |      |                       |         |                       |                       |        |
| D-Glutamine and D-glutamate metabolism              | 6     | 0.03     | 2    | $2.60 \times 10^{-4}$ | 3.58    | $2.19 \times 10^{-2}$ | $1.09 \times 10^{-2}$ | 0.50   |
| Aminoacyl-tRNA biosynthesis                         | 48    | 0.22     | 3    | $8.95 \times 10^{-4}$ | 3.05    | $7.34 \times 10^{-2}$ | $2.51 \times 10^{-2}$ | 0.10   |
| Arginine biosynthesis                               | 14    | 0.06     | 2    | $1.55 \times 10^{-3}$ | 2.81    | $1.26 \times 10^{-1}$ | $3.26 \times 10^{-2}$ | 0.19   |
| Alanine, aspartate and glutamate metabolism         | 28    | 0.13     | 2    | $6.25 \times 10^{-3}$ | 2.20    | $5.00 \times 10^{-1}$ | $8.75 \times 10^{-2}$ | 0.28   |



|                                                     |    |      |   |                       |      |                       |                       |      |
|-----------------------------------------------------|----|------|---|-----------------------|------|-----------------------|-----------------------|------|
| Glutathione metabolism                              | 28 | 0.13 | 2 | $6.25 \times 10^{-3}$ | 2.20 | $5.00 \times 10^{-1}$ | $8.75 \times 10^{-2}$ | 0.19 |
| Taurine and hypotaurine metabolism                  | 8  | 0.04 | 1 | $3.56 \times 10^{-2}$ | 1.45 | 1.00                  | $3.74 \times 10^{-1}$ | 0.33 |
| CD5 vs. Ctrl                                        |    |      |   |                       |      |                       |                       |      |
| D-Glutamine and D-glutamate metabolism              | 6  | 0.02 | 2 | $1.24 \times 10^{-4}$ | 3.91 | $1.04 \times 10^{-2}$ | $5.22 \times 10^{-3}$ | 0.50 |
| Arginine biosynthesis                               | 14 | 0.05 | 2 | $7.46 \times 10^{-4}$ | 3.13 | $6.12 \times 10^{-2}$ | $2.09 \times 10^{-2}$ | 0.19 |
| Alanine, aspartate and glutamate metabolism         | 28 | 0.09 | 2 | $3.04 \times 10^{-3}$ | 2.52 | $2.47 \times 10^{-1}$ | $6.39 \times 10^{-2}$ | 0.28 |
| Taurine and hypotaurine metabolism                  | 8  | 0.03 | 1 | $2.56 \times 10^{-2}$ | 1.59 | 1.00                  | $2.69 \times 10^{-1}$ | 0.33 |
| CD6 vs. Ctrl                                        |    |      |   |                       |      |                       |                       |      |
| Glutathione metabolism                              | 28 | 0.09 | 2 | $3.04 \times 10^{-3}$ | 2.52 | $2.56 \times 10^{-1}$ | $2.48 \times 10^{-1}$ | 0.19 |
| Aminoacyl-tRNA biosynthesis                         | 48 | 0.15 | 2 | $8.85 \times 10^{-3}$ | 2.05 | $7.26 \times 10^{-1}$ | $2.48 \times 10^{-1}$ | 0.07 |
| Taurine and hypotaurine metabolism                  | 8  | 0.03 | 1 | $2.56 \times 10^{-2}$ | 1.59 | 1.00                  | $5.37 \times 10^{-1}$ | 0.33 |
| CD7 vs. Ctrl                                        |    |      |   |                       |      |                       |                       |      |
| D-Glutamine and D-glutamate metabolism              | 6  | 0.02 | 2 | $1.86 \times 10^{-4}$ | 3.73 | $1.56 \times 10^{-2}$ | $1.56 \times 10^{-2}$ | 0.5  |
| Arginine biosynthesis                               | 14 | 0.05 | 2 | $1.11 \times 10^{-3}$ | 2.95 | $9.12 \times 10^{-2}$ | $9.12 \times 10^{-2}$ | 0.19 |
| Alanine, aspartate and glutamate metabolism         | 28 | 0.11 | 2 | $4.52 \times 10^{-3}$ | 2.35 | $7.59 \times 10^{-2}$ | $7.59 \times 10^{-2}$ | 0.28 |
| Glutathione metabolism                              | 28 | 0.11 | 2 | $4.52 \times 10^{-3}$ | 2.35 | $7.59 \times 10^{-2}$ | $7.59 \times 10^{-2}$ | 0.19 |
| Taurine and hypotaurine metabolism                  | 8  | 0.03 | 1 | $3.06 \times 10^{-2}$ | 1.51 | $2.86 \times 10^{-1}$ | $2.86 \times 10^{-1}$ | 0.33 |
| CD8 vs. Ctrl                                        |    |      |   |                       |      |                       |                       |      |
| Arginine biosynthesis                               | 14 | 0.05 | 2 | $7.46 \times 10^{-4}$ | 3.13 | $6.19 \times 10^{-2}$ | $2.75 \times 10^{-2}$ | 0.19 |
| Alanine, aspartate and glutamate metabolism         | 28 | 0.05 | 2 | $3.04 \times 10^{-3}$ | 2.52 | $2.47 \times 10^{-2}$ | $6.39 \times 10^{-2}$ | 0.31 |
| Phenylalanine, tyrosine and tryptophan biosynthesis | 4  | 0.01 | 1 | $1.29 \times 10^{-2}$ | 1.89 | 1.00                  | $2.16 \times 10^{-1}$ | 0.50 |
| CD9 vs. Ctrl                                        |    |      |   |                       |      |                       |                       |      |
| Glutathione metabolism                              | 28 | 0.18 | 3 | $5.83 \times 10^{-4}$ | 3.23 | $4.90 \times 10^{-2}$ | $4.90 \times 10^{-2}$ | 0.22 |
| Aminoacyl-tRNA biosynthesis                         | 48 | 0.31 | 3 | $2.87 \times 10^{-3}$ | 2.54 | $2.38 \times 10^{-1}$ | $9.00 \times 10^{-2}$ | 0.10 |

|                                                     |    |      |   |                       |      |                       |                       |      |
|-----------------------------------------------------|----|------|---|-----------------------|------|-----------------------|-----------------------|------|
| Arginine biosynthesis                               | 14 | 0.09 | 2 | $3.27 \times 10^{-3}$ | 2.49 | $2.68 \times 10^{-1}$ | $9.00 \times 10^{-2}$ | 0.19 |
| Alanine, aspartate and glutamate metabolism         | 28 | 0.18 | 2 | $1.30 \times 10^{-2}$ | 1.89 | 1.00                  | $1.66 \times 10^{-1}$ | 0.31 |
| Glycine, serine and threonine metabolism            | 33 | 0.21 | 2 | $1.78 \times 10^{-2}$ | 1.75 | 1.00                  | $1.66 \times 10^{-1}$ | 0.23 |
| Taurine and hypotaurine metabolism                  | 8  | 0.05 | 1 | $5.06 \times 10^{-2}$ | 1.30 | 1.00                  | $3.03 \times 10^{-1}$ | 0.33 |
| CD10 vs. Ctrl                                       |    |      |   |                       |      |                       |                       |      |
| Aminoacyl-tRNA biosynthesis                         | 48 | 0.31 | 4 | $1.49 \times 10^{-4}$ | 3.83 | $1.25 \times 10^{-2}$ | $1.22 \times 10^{-2}$ | 0.14 |
| D-Glutamine and D-glutamate metabolism              | 6  | 0.04 | 2 | $5.55 \times 10^{-4}$ | 3.26 | $4.06 \times 10^{-2}$ | $1.22 \times 10^{-2}$ | 0.50 |
| Glutathione metabolism                              | 28 | 0.18 | 3 | $5.83 \times 10^{-4}$ | 3.23 | $4.72 \times 10^{-2}$ | $1.22 \times 10^{-2}$ | 0.22 |
| Arginine biosynthesis                               | 14 | 0.09 | 2 | $3.27 \times 10^{-3}$ | 2.49 | $2.59 \times 10^{-1}$ | $4.52 \times 10^{-2}$ | 0.19 |
| Alanine, aspartate and glutamate metabolism         | 28 | 0.18 | 2 | $1.30 \times 10^{-2}$ | 1.89 | $9.97 \times 10^{-1}$ | $1.36 \times 10^{-1}$ | 0.28 |
| Glycine, serine and threonine metabolism            | 33 | 0.21 | 2 | $1.78 \times 10^{-2}$ | 1.75 | 1.00                  | $1.49 \times 10^{-1}$ | 0.23 |
| Valine, leucine and isoleucine biosynthesis         | 8  | 0.05 | 1 | $5.06 \times 10^{-2}$ | 1.30 | 1.00                  | $3.54 \times 10^{-1}$ | 0.25 |
| CD11 vs. Ctrl                                       |    |      |   |                       |      |                       |                       |      |
| Taurine and hypotaurine metabolism                  | 8  | 0.02 | 1 | $1.54 \times 10^{-2}$ | 1.81 | 1.00                  | 1.00                  | 0.33 |
| CD12 vs. Ctrl                                       |    |      |   |                       |      |                       |                       |      |
| Aminoacyl-tRNA biosynthesis                         | 48 | 0.28 | 6 | $5.03 \times 10^{-8}$ | 7.30 | $4.23 \times 10^{-6}$ | $4.23 \times 10^{-6}$ | 0.21 |
| Valine, leucine and isoleucine biosynthesis         | 8  | 0.05 | 2 | $8.25 \times 10^{-4}$ | 3.08 | $6.84 \times 10^{-2}$ | $3.46 \times 10^{-2}$ | 0.25 |
| Alanine, aspartate and glutamate metabolism         | 28 | 0.16 | 2 | $1.05 \times 10^{-2}$ | 1.98 | $8.49 \times 10^{-1}$ | $2.20 \times 10^{-1}$ | 0.34 |
| Phenylalanine, tyrosine and tryptophan biosynthesis | 4  | 0.02 | 1 | $2.30 \times 10^{-2}$ | 1.64 | 1.00                  | $3.21 \times 10^{-1}$ | 0.50 |
